# Supplementary material for: Noradrenergic Modulation of Learned and Innate Behaviors in Dopamine Transporter Knockout Rats by Guanfacine
Source: MDPI journal article supplement (doi:10.3390/biomedicines11010222), 2023-01-15
Supplement: s1 [file s1]

Table S1. The statistical analyses of the distance traveled by DAT-KO and WT rats in Hebb-Williams maze after saline, acute (aGF), and repeated (rGF) guanfacine administration. Two-way analysis of variance (two-way ANOVA) with Dunn's multiple comparisons post-hoc test was used. Statistically significant values indicated in green; ns – not significant.

|                                            |           |      |          |
|--------------------------------------------|-----------|------|----------|
| Two-way ANOVA                              |           |      |          |
| Interaction                                |           | **   | p=0.0071 |
| treatment                                  |           | **** | p<0.0001 |
| genotype                                   |           | *    | p=0.0222 |
| Sidak's multiple comparisons post-hoc test |           |      |          |
|                                            | treatment |      |          |
| WT vs. DAT-KO                              | saline    | **** | p<0.0001 |
| WT vs. DAT-KO                              | aGF       | **   | p=0.0066 |
| WT vs. DAT-KO                              | rGF       | ns   | p>0.9999 |
|                                            | genotype  |      |          |
| saline vs. aGF                             | WT        | ns   | p>0.9999 |
| saline vs. rGF                             | WT        | ns   | p>0.9999 |
| saline vs. aGF                             | DAT-KO    | ns   | p=0.9080 |
| saline vs. rGF                             | DAT-KO    | **   | p=0.0017 |
| compared to WT with saline administration  |           |      |          |
| WT saline vs. DAT-KO saline                |           | **** | p<0.0001 |
| WT saline vs. DAT-KO aGF                   |           | **   | 0.0034   |
| WT saline vs. DAT-KO rGF                   |           | ns   | 0.9537   |

Table S2. The statistical analyses of the time of reaching the goal box of Hebb-Williams maze by DAT-KO and WT rats after saline, acute (aGF), and repeated (rGF) guanfacine administration. Two-way analysis of variance (two-way ANOVA) with Dunn's multiple comparisons post-hoc test was used. Statistically significant values indicated in green; ns – not significant.

|                                            |           |     |          |
|--------------------------------------------|-----------|-----|----------|
| Two-way ANOVA                              |           |     |          |
| Interaction                                |           | ns  | p=0.1145 |
| treatment                                  |           | *** | p=0.0003 |
| genotype                                   |           | ns  | p=0.8223 |
| Sidak's multiple comparisons post-hoc test |           |     |          |
|                                            | treatment |     |          |
| WT vs. DAT-KO                              | saline    | *   | p=0.0262 |
| WT vs. DAT-KO                              | aGF       | *   | p=0.0441 |
| WT vs. DAT-KO                              | rGF       | ns  | p>0.9999 |
|                                            | genotype  |     |          |
| saline vs. aGF                             | WT        | ns  | p>0.9999 |
| saline vs. rGF                             | WT        | ns  | p=0.9596 |
| saline vs. aGF                             | DAT-KO    | ns  | p>0.9999 |
| saline vs. rGF                             | DAT-KO    | ns  | p=0.9315 |
| compared to WT with saline administration  |           |     |          |
| WT saline vs. DAT-KO saline                |           | **  | p=0.0070 |
| WT saline vs. DAT-KO aGF                   |           | *   | p=0.0376 |
| WT saline vs. DAT-KO rGF                   |           | ns  | p=0.4229 |

Table S3. The statistical analyses of the percentage of time spent in the Hebb-Williams maze error zones by DAT-KO and WT rats after saline, acute (aGF), and repeated (rGF) guanfacine administration. Two-way analysis of variance (two-way ANOVA) with Dunn's multiple comparisons post-hoc test was used. Statistically significant values indicated in green; ns – not significant.

| Two-way ANOVA                              |           |     |          |
|--------------------------------------------|-----------|-----|----------|
| Interaction                                |           | **  | p=0.0047 |
| treatment                                  |           | *   | p=0.0372 |
| genotype                                   |           | ns  | p=0.2582 |
| Sidak's multiple comparisons post-hoc test |           |     |          |
|                                            | treatment |     |          |
| WT vs. DAT-KO                              | saline    | *** | p=0.0007 |
| WT vs. DAT-KO                              | aGF       | ns  | p>0.9999 |
| WT vs. DAT-KO                              | rGF       | ns  | p>0.9999 |
|                                            | genotype  |     |          |
| saline vs. aGF                             | WT        | ns  | p=0.9533 |
| saline vs. rGF                             | WT        | ns  | p=0.9941 |
| saline vs. aGF                             | DAT-KO    | ns  | p=0.1755 |
| saline vs. rGF                             | DAT-KO    | *   | p=0.0268 |
| compared to WT with saline administration  |           |     |          |
| WT saline vs. DAT-KO saline                |           | *** | p=0.0007 |
| WT saline vs. DAT-KO aGF                   |           | ns  | p=0.5761 |
| WT saline vs. DAT-KO rGF                   |           | ns  | p=0.9823 |

Table S4. The statistical analyses of the number of return runs by DAT-KO and WT rats in the Hebb-Williams maze after saline, acute (aGF), and repeated (rGF) guanfacine administration. Two-way analysis of variance (two-way ANOVA) with Dunn's multiple comparisons post-hoc test was used. Statistically significant values indicated in green; ns – not significant.

| Two-way ANOVA                             |           |      |          |
|-------------------------------------------|-----------|------|----------|
| Interaction                               |           | ns   | p=0.0901 |
| treatment                                 |           | *    | p=0.0143 |
| genotype                                  |           | **** | p<0.0001 |
| Dunn's multiple comparisons post-hoc test |           |      |          |
|                                           | treatment |      |          |
| WT vs. DAT-KO                             | saline    | **** | p<0.0001 |
| WT vs. DAT-KO                             | aGF       | ns   | p=0.2182 |
| WT vs. DAT-KO                             | rGF       | ns   | p=0.1226 |
|                                           | genotype  |      |          |
| saline vs. aGF                            | WT        | ns   | p>0.9999 |
| saline vs. rGF                            | WT        | ns   | p=0.9960 |
| saline vs. aGF                            | DAT-KO    | **   | p=0.0020 |
| saline vs. rGF                            | DAT-KO    | **   | p=0.0089 |
| compared to WT with saline administration |           |      |          |
| WT saline vs. DAT-KO saline               |           | **** | p<0.0001 |
| WT saline vs. DAT-KO aGF                  |           | ns   | p=0.2393 |
| WT saline vs. DAT-KO rGF                  |           | ns   | p=0.1817 |

Table S5. The statistical analyses of pre-pulse inhibition index (PPI) for DAT-KO and WT rats after saline, acute (aGF), and repeated (rGF) guanfacine administration. Two-way analysis of variance (two-way ANOVA) with multiple comparisons Fisher's LSD post-hoc test was used. Statistically significant values indicated in green; ns – not significant.

| Two-way ANOVA                                      |           |      | P value   |
|----------------------------------------------------|-----------|------|-----------|
| Interaction                                        |           | ns   | p=0.8395  |
| treatment                                          |           | **   | p=0.0073  |
| genotype                                           |           | **** | p<0.0001  |
| multiple comparisons<br>Fisher's LSD post-hoc test |           |      |           |
|                                                    | treatment |      |           |
| WT vs. DAT-KO                                      | saline    | **   | p=0.0020  |
| WT vs. DAT-KO                                      | aGF       | **   | p=0.0075  |
| WT vs. DAT-KO                                      | rGF       | **   | p=0.0012  |
|                                                    | genotype  |      |           |
| saline vs. aGF                                     | WT        | ns   | p=0.1247  |
| saline vs. rGF                                     | WT        | *    | p=0.0305  |
| saline vs. aGF                                     | DAT-KO    | *    | p=0.0272  |
| saline vs. rGF                                     | DAT-KO    | *    | p=0.0485  |
| compared to WT with saline administration          |           |      |           |
| WT saline vs. DAT-KO saline                        |           | **   | p=0.0020  |
| WT saline vs. DAT-KO aGF                           |           | ns   | p= 0.2554 |
| WT saline vs. DAT-KO rGF                           |           | ns   | p=0.2288  |

Table S6. The statistical analyses of power spectral density of striatum LFP at various frequency bands in WT and DAT-KO rats. One-way analysis of variance (conventional one-way ANOVA for parametric and Kruskal-Wallis test for nonparametric data) was used. Post-test for linear trend demonstrated changes after saline, acute (aGF), and repeated (rGF) guanfacine administration; Dunn's multiple comparisons test was used to compare power spectra density after saline vs. aGF and after saline vs. rGF administration. Statistically significant values indicated in green; ns – not significant.

|                       | WT                                       |                                   | DAT-KO         |                                                                              |
|-----------------------|------------------------------------------|-----------------------------------|----------------|------------------------------------------------------------------------------|
|                       | Ordinary one-way ANOVA (parametric test) |                                   |                |                                                                              |
| <u>frequency band</u> | <u>P value</u>                           | <u>Post test for linear trend</u> | <u>P value</u> | <u>Sidak's multiple comparisons test</u><br>saline vs. aGF<br>saline vs. rGF |
| delta<br>0.9–3 Hz     | ns; p=0.5226                             | ns; p=0.2580                      | **** p<0.0001  | **** p<0.0001<br>** p=0.0027                                                 |
|                       | <u>P value</u>                           | <u>Post test for linear trend</u> | <u>P value</u> | <u>Post test for linear trend</u>                                            |
| theta<br>4–8 Hz       | **** p<0.0001                            | **** p<0.0001                     | **** p<0.0001  | **** p<0.0001                                                                |
| alpha<br>9–11 Hz      | *** p=0.0008                             | *** p=0.0004                      | **** p<0.0001  | *** p=0.0006                                                                 |
|                       | Kruskal-Wallis test (nonparametric test) |                                   |                |                                                                              |

|                          | <u>P value</u> | <u>Dunn's multiple comparisons test</u><br>saline vs. aGF<br>saline vs. rGF | <u>P value</u> | <u>Dunn's multiple comparisons test</u><br>saline vs. aGF<br>saline vs. rGF |
|--------------------------|----------------|-----------------------------------------------------------------------------|----------------|-----------------------------------------------------------------------------|
| lower beta<br>12–19 Hz   | ** p=0.0046    | * p=0.0216<br>** p=0.0044                                                   | **** p<0.0001  | **** p<0.0001<br>**** p<0.0001                                              |
| higher beta<br>20–29 Hz  | ** p=0.0030    | ** p=0.0046<br>** p=0.0089                                                  | **** p<0.0001  | **** p<0.0001<br>**** p<0.0001                                              |
| lower gamma<br>30–48 Hz  | **** p<0.0001  | **** p<0.0001<br>**** p<0.0001                                              | **** p<0.0001  | **** p<0.0001<br>**** p<0.0001                                              |
| higher gamma<br>52–74 Hz | **** p<0.0001  | **** p<0.0001<br>**** p<0.0001                                              | **** p<0.0001  | **** p<0.0001<br>**** p<0.0001                                              |

Table S7. The statistical analyses of power spectral density of prefrontal cortex LFP at various frequency bands in WT and DAT-KO rats. One-way analysis of variance (conventional one-way ANOVA for parametric and Kruskal-Wallis test for nonparametric data) was used. Post-test for linear trend demonstrated changes after saline, acute (aGF), and repeated (rGF) guanfacine administration; Dunn's multiple comparisons test was used to compare power spectra density after saline vs. aGF and after saline vs. rGF administration. Statistically significant values indicated in green; ns – not significant.

|                          | WT                                       |                                                                             | DAT-KO         |                                                                              |
|--------------------------|------------------------------------------|-----------------------------------------------------------------------------|----------------|------------------------------------------------------------------------------|
|                          | Ordinary one-way ANOVA (parametric test) |                                                                             |                |                                                                              |
| <u>frequency band</u>    | <u>P value</u>                           | <u>Post test for linear trend</u>                                           | <u>P value</u> | <u>Post test for linear trend</u>                                            |
| delta<br>0.9–3 Hz        | ns; p=0.3422                             | ns; p=0.4202                                                                | *** p=0.0003   | **** p<0.0001                                                                |
| theta<br>4–8 Hz          | **** p<0.0001                            | **** p<0.0001                                                               | ns; p=0.9540   | ns; p=0.9422                                                                 |
|                          | <u>P value</u>                           | <u>Post test for linear trend</u>                                           | <u>P value</u> | <u>Sidak's multiple comparisons test</u><br>saline vs. aGF<br>saline vs. rGF |
| alpha<br>9–11 Hz         | **** p<0.0001                            | **** p<0.0001                                                               | **** p<0.0001  | * p=0.0219<br>**** p<0.0001                                                  |
|                          | Kruskal-Wallis test (nonparametric test) |                                                                             |                |                                                                              |
|                          | <u>P value</u>                           | <u>Dunn's multiple comparisons test</u><br>saline vs. aGF<br>saline vs. rGF | <u>P value</u> | <u>Dunn's multiple comparisons test</u><br>saline vs. aGF<br>saline vs. rGF  |
| lower beta<br>12–19 Hz   | **** p<0.0001                            | * p=0.0293<br>**** p<0.0001                                                 | **** p<0.0001  | ns; p=0.1119<br>* p=0.0139                                                   |
| higher beta<br>20–29 Hz  | **** p<0.0001                            | * p=0.0230<br>**** p<0.0001                                                 | * p=0.0261     | ns; p=0.4216<br>* p=0.0140                                                   |
| lower gamma<br>30–48 Hz  | **** p<0.0001                            | ns; p=0.3068<br>**** p<0.0001                                               | **** p<0.0001  | **** p<0.0001<br>ns; p=0.3938                                                |
| higher gamma<br>52–74 Hz | **** p<0.0001                            | ns; p=0.1232<br>**** p<0.0001                                               | **** p<0.0001  | ** p=0.0027<br>ns; p=0.2191                                                  |

Table S8. The coherence between the activity of the prefrontal cortex (PFC) and Striatum (Str) at various frequency bands. One-way analysis of variance (ordinary one-way ANOVA) for coherence PFC-Str in WT and DAT-KO rats. Post-test for linear trend demonstrates changes after saline, acute (aGF), and repeated (rGF) guanfacine administration. Statistically significant values indicated in green; ns – not significant.

|                          | WT                                       |                            | DAT-KO        |                            |
|--------------------------|------------------------------------------|----------------------------|---------------|----------------------------|
|                          | Ordinary one-way ANOVA (parametric test) |                            |               |                            |
| frequency band           | P value                                  | Post test for linear trend | P value       | Post test for linear trend |
| delta<br>0.9–3 Hz        | ns; p=0.6564                             | ns; p=0.8442               | * p=0.0203    | ** p=0.0065                |
| theta<br>4–8 Hz          | **** p<0.0001                            | **** p<0.0001              | **** p<0.0001 | **** p<0.0001              |
| alpha<br>9–11 Hz         | **** p<0.0001                            | **** p<0.0001              | **** p<0.0001 | **** p<0.0001              |
| lower beta<br>12–19 Hz   | **** p<0.0001                            | **** p<0.0001              | **** p<0.0001 | **** p<0.0001              |
| higher beta<br>20–29 Hz  | ns; p=0.0720                             | ns; p=0.0531               | **** p<0.0001 | **** p<0.0001              |
| lower gamma<br>30–48 Hz  | **** p<0.0001                            | **** p<0.0001              | **** p<0.0001 | **** p<0.0001              |
| higher gamma<br>52–74 Hz | **** p<0.0001                            | **** p<0.0001              | **** p<0.0001 | **** p<0.0001              |
